# Supplementary material
Source: Elsevier journal article supplement (https://www.sciencedirect.com/science/article/pii/S2173573520300429)
Supplement: mmc1 [file S2173573520300429:mmc1.docx]

1. [{(Appendix)}] Additional Material l

Additional material to this article in its electronic version is available on <doi:10.1016/j.otorri.2019.02.004>.

1. [{(Appendix A)}] Supplementary Material

mmc1
